# Supplementary material
Source: ML conference proceedings conference paper supplement (https://aclanthology.org/2020.emnlp-main.628)
Supplement: OptionalSupplementaryMaterial [file TabFact__EMNLP_2020-13-16.pdf › TabFact__EMNLP_2020-13-16.pdf]

## A Appendices

### A.1 Statistics of TABFACT Dataset

Table 6 provides the statistics of TABFACT (Chen et al., 2020), a recent large-scale table-based fact verification dataset on which we evaluate our method. Each evidence table comes along with 2 to 20 statements, and consists of 14 rows and 5-6 rows in average.

### A.2 Pre-defined Operations in Program Selection

Programs consists of operations, and the definition of operations are listed in Table 7, mainly following (Chen et al., 2020).

### A.3 Pre-defined Templates for Verbalization

In our proposed framework, there are 50 pre-defined operations, details are in Table 7. For each operation, we define templates for operation and its executed result. There are three types of executed results: (1) string or number type; (2) boolean type; (3) view or row type, where it is a sub-table or rows extracted from the evidence table.

We represent templates for different types of operations accordingly. The detailed templates are listed in the following Table 8, Table 9 and Table 10.

| Split | Sentence | Table  | Row  | Col |
|-------|----------|--------|------|-----|
| Train | 92,283   | 13,182 | 14.1 | 5.5 |
| Val   | 12,792   | 1,696  | 14.0 | 5.4 |
| Test  | 12,779   | 1,695  | 14.2 | 5.4 |

Table 6: Statistics of TABFACT and the split of Train/Val/Test.

| Operations                                                                                        | Arguments                                              | Output            | Function                                                                                                                   |
|---------------------------------------------------------------------------------------------------|--------------------------------------------------------|-------------------|----------------------------------------------------------------------------------------------------------------------------|
| count                                                                                             | View                                                   | Number            | Return the number of rows in the View                                                                                      |
|                                                                                                   | View,<br>Header String,<br>Cell String/<br>Number      | Bool              | Return whether the cell string/number exists under the Header Column of the given View                                     |
| without                                                                                           | View,<br>Header String,<br>Cell String/<br>Cell Number | Bool              | Return whether the cell string/number does not exist under the Header Column of the given view                             |
| none                                                                                              | String                                                 | Bool              | Whether the string represents None, like “None”, “No”, “-”, “No information provided”                                      |
| before/after                                                                                      | Row, Row                                               | Row               | Returns whether row1 is before/after row2                                                                                  |
| first/second/<br>third/fourth                                                                     | View, Row                                              | Bool              | Returns whether the row is in the first/second/<br>third position of the view                                              |
| avg/sum/<br>max/min                                                                               | View,<br>Header String                                 | Number            | Returns the average/summation/max/min value under the Header Column of the given view                                      |
| argmin/<br>argmax                                                                                 | View,<br>Header String                                 | Row               | Returns the row with the max/min value under the Header Column of the given view                                           |
| Hop                                                                                               | Row,<br>Header String                                  | Number/<br>String | Returns the cell value under the Header Column of the given row                                                            |
| diff/add                                                                                          | Number, Number                                         | Number            | Perform arithmetic operations on two numbers                                                                               |
| greater/less                                                                                      | Number, Number                                         | Bool              | Returns whether the first number is greater/less than the second number                                                    |
| Equal/<br>Unequal                                                                                 | String, String/<br>Number, Number                      | Bool              | Compare two numbers or strings to see whether they are the same                                                            |
| filter_eq/<br>filter_greater/<br>filter_less/<br>filter_greater_or_equal/<br>filter_less_or_equal | View,<br>Header String,<br>Number                      | View              | Returns the subview of the given with the cell values under the Header column greater/less/eq/... against the given number |
| all_eq/all_greater/<br>all_less/<br>all_greater_or_equal/<br>all_less_or_equal                    | View,<br>Header String,<br>Number                      | Bool              | Returns the whether all of the cell values under the Header column are greater/less/eq/... against the given number        |
| and/or                                                                                            | Bool, Bool                                             | Bool              | Returns the Boolean operation results of two inputs                                                                        |

Table 7: Details of pre-defined operations.

| Operation<br>operator, [arguments], answer          | Templates                                                           |                                                                                      |
|-----------------------------------------------------|---------------------------------------------------------------------|--------------------------------------------------------------------------------------|
|                                                     | Operation                                                           | Operation Results                                                                    |
| count, [verb_arg1], ans                             | the number of [verb_arg1]                                           | the number of [verb_arg1] is [string(ans)]                                           |
| avg/sum/max/min,<br>[verb_arg1,verb_arg2], ans      | average/sum/maximum/minimum<br>[verb_arg1] where column [verb_arg2] | average/sum/maximum/minimum [verb_arg1]<br>where column [verb_arg2] is [string(ans)] |
| add/diff, [verb_arg1,<br>verb_arg2], ans            | sum/difference of [verb_arg1]<br>and [verb_arg2]                    | sum/difference of [verb_arg1] and [verb_arg2]<br>is [string(ans)]                    |
| uniq_num/uniq_string,<br>[verb_arg1, verb_arg2],ans | the unique value of [verb_arg1]<br>in column [verb_arg2]            | the unique value of [verb_arg1] in column<br>[verb_arg2] is [string(ans)]            |
| most_freq,<br>[verb_arg1, verb_arg2],ans            | the most frequent value of [verb_arg1]<br>in column [verb_arg2]     | the most frequent value of [verb_arg1]<br>in column [verb_arg2] is [string(ans)]     |
| half/one_third,<br>[verb_arg1], ans                 | half/one third of value in [verb_arg1]                              | half/one third of value in [verb_arg1] is<br>[string(ans)]                           |
| num_hop,<br>[verb_arg1, verb_arg2],ans              | the first value of [verb_arg1] where<br>column [verb_arg2]          | the first value of [verb_arg1] where<br>column [verb_arg2] is [string(ans)]          |

Table 8: Templates for operations with string or number type executed results.

| Operation<br>operator, [arguments], answer                                                          | Templates                                                                                      |                                                                                                                            |
|-----------------------------------------------------------------------------------------------------|------------------------------------------------------------------------------------------------|----------------------------------------------------------------------------------------------------------------------------|
|                                                                                                     | Operation                                                                                      | Operation Results                                                                                                          |
| only, [verb_arg1],<br>ans:true/false                                                                | number of rows in [verb_arg1]                                                                  | number of rows in [verb_arg1]<br>[true:is/false:is not] one                                                                |
| several, [verb_arg1],<br>ans:true/false                                                             | number of rows in [verb_arg1]                                                                  | number of rows in [verb_arg1]<br>[true:is/false:is not] more than one                                                      |
| zero/none, [verb_arg1],<br>ans:true/false                                                           | the [verb_arg1]                                                                                | the [verb_arg1]<br>[true:is/false:is not] zero/none                                                                        |
| first/second/third/fourth,<br>[verb_arg1, verb_arg2],<br>ans:true/false                             | the first/second/third/fourth row<br>[verb_arg2] in [verb_arg1]                                | the first/second/third/fourth row<br>in [verb_arg1] [true:is/false:is not]<br>row [verb_arg2]                              |
| and/or, [verb_arg1,<br>verb_arg2], ans:true/false                                                   | [verb_arg1] and/or [verb_arg2]                                                                 | [verb_arg1] and/or [verb_arg2]<br>[true:is/false:is not] true                                                              |
| greater/less, [verb_arg1,<br>verb_arg2], ans:true/false                                             | [verb_arg1] greater/less<br>than [verb_arg2]                                                   | [verb_arg1] [true:is/false: is not]<br>greater/less than [verb_arg2]                                                       |
| equal, [verb_arg1,<br>verb_arg2], ans:true/false                                                    | [verb_arg1] equal to<br>[verb_arg2]                                                            | [verb_arg1] [true:is/false: is not]<br>equal to [verb_arg2]                                                                |
| unequal, [verb_arg1,<br>verb_arg2], ans:true/false                                                  | [verb_arg1] not equal to<br>[verb_arg2]                                                        | [verb_arg1] [true:is/false: is not]<br>not equal to [verb_arg2]                                                            |
| with/without,<br>[verb_arg1, verb_arg2,<br>verb_arg3], ans:true/false                               | [verb_arg1] where column<br>[verb_arg2] with/without value<br>[verb_arg3]                      | [verb_arg1] where column<br>[verb_arg2] with/without value<br>[verb_arg3] [true:is/false:is not] true                      |
| all_equal,<br>[verb_arg1, verb_arg2,<br>verb_arg3], ans:true/false                                  | [verb_arg1] where column<br>[verb_arg2] all equal to value<br>[verb_arg3]                      | [verb_arg1] where column<br>[verb_arg2] all equal to value<br>[verb_arg3] [true:is/false:is not] true                      |
| all_less/all_greater,<br>[verb_arg1, verb_arg2,<br>verb_arg3], ans:true/false                       | [verb_arg1] where column<br>[verb_arg2] all less/greater<br>than value [verb_arg3]             | [verb_arg1] where column<br>[verb_arg2] all less/greater than<br>value [verb_arg3] [true:is/false:is not] true             |
| all_less_or_equal/<br>all_greater_or_equal,<br>[verb_arg1, verb_arg2,<br>verb_arg3], ans:true/false | [verb_arg1] where column<br>[verb_arg2] all less/greater<br>than or equal to value [verb_arg3] | [verb_arg1] where column [verb_arg2]<br>all less/greater than or equal to<br>value [verb_arg3] [true:is/false:is not] true |

Table 9: Templates for operations with boolean type executed results.

| Operation<br>operator, [arguments], answer                                                  | Templates                                                                                  |                                                                                                                    |
|---------------------------------------------------------------------------------------------|--------------------------------------------------------------------------------------------|--------------------------------------------------------------------------------------------------------------------|
|                                                                                             | Operation                                                                                  | Operation Results                                                                                                  |
| before/after,<br>[verb_arg1, verb_arg2], ans                                                | [verb_arg1] before/after<br>[verb_arg2]                                                    | [verb_arg1] before/after [verb_arg2]<br>is row [indices of ans]                                                    |
| argmax/argmin,<br>[verb_arg1, verb_arg2], ans                                               | row where column [verb_arg2]<br>with maximum/minimum<br>value in [verb_arg1]               | row where column [verb_arg2]<br>with maximum/minimum<br>value in [verb_arg1] is row [indices of ans]               |
| filter_eq,<br>[verb_arg1, verb_arg2,<br>verb_arg3], ans                                     | [verb_arg1] where column<br>[verb_arg2] equal to value<br>[verb_arg3]                      | [verb_arg1] where column<br>[verb_arg2] equal to value<br>[verb_arg3] is row [indices of ans]                      |
| filter_less/filter_greater,<br>[verb_arg1, verb_arg2,<br>verb_arg3], ans:true/false         | [verb_arg1] where column<br>[verb_arg2] less/greater<br>than value [verb_arg3]             | [verb_arg1] where column<br>[verb_arg2] less/greater than<br>value [verb_arg3] is row [indices of ans]             |
| less_or_equal/<br>greater_or_equal,<br>[verb_arg1, verb_arg2,<br>verb_arg3], ans:true/false | [verb_arg1] where column<br>[verb_arg2] less/greater<br>than or equal to value [verb_arg3] | [verb_arg1] where column [verb_arg2]<br>less/greater than or equal to<br>value [verb_arg3] is row [indices of ans] |

Table 10: Templates for operations with view or row type executed results.
